CORRECTION

# Correction: Decreased TUSC3 Promotes Pancreatic Cancer Proliferation, Invasion and Metastasis

The PLOS ONE Staff

[Fig 5](#) appears incorrectly in the published article. Please see the complete, correct [Fig 5](#) and its legend here. The publisher apologizes for the error.

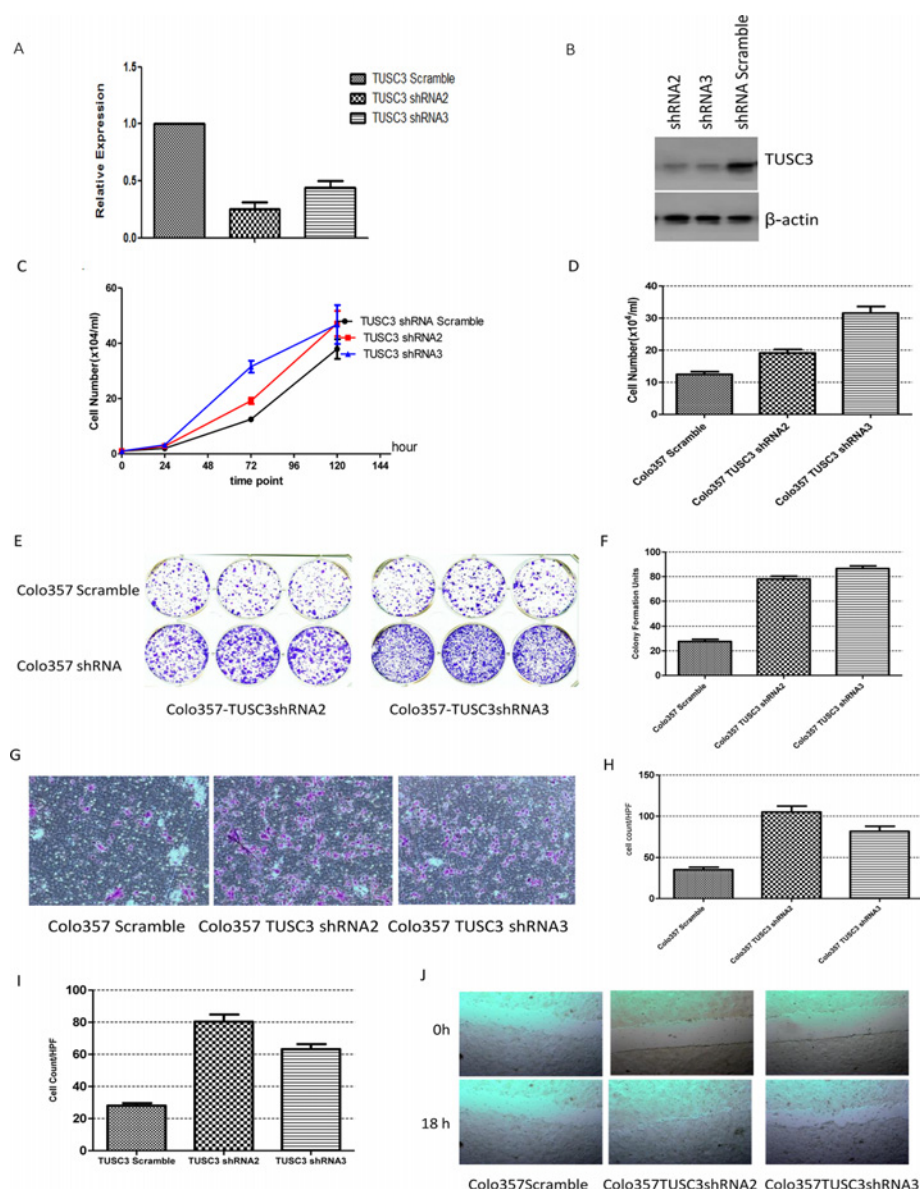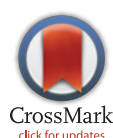

CrossMark  
click for updates

## OPEN ACCESS

**Citation:** The PLOS ONE Staff (2016) Correction: Decreased TUSC3 Promotes Pancreatic Cancer Proliferation, Invasion and Metastasis. PLoS ONE 11 (3): e0151752. doi:10.1371/journal.pone.0151752

**Published:** March 14, 2016

**Copyright:** © 2016 The PLOS ONE Staff. This is an open access article distributed under the terms of the [Creative Commons Attribution License](#), which permits unrestricted use, distribution, and reproduction in any medium, provided the original author and source are credited.

**Fig 5. Decreased TUSC3 expression promotes tumor cell growth, migration and invasion.** (A, B) TUSC3 is effectively knocked-down in Colo357 cell lines shown by (A) RT-PCR and (B) Western blot. (C, D) Proliferation is enhanced with TUSC3 knockdown, cell number counts are significantly different at 72 hours (Colo357 TUSC3 shRNA2 vs Colo357 Scramble  $p = 0.0086$ , Colo357 TUSC3 shRNA3 vs Colo357 Scramble  $p = 0.0011$ ) (D). (E, F) Colony Formation is enhanced with TUSC3 knockdown (Colo357 TUSC3 shRNA2 vs Colo357 Scramble  $p < 0.0001$ , Colo357 TUSC3 shRNA3 vs Colo357 Scramble  $p < 0.0001$ ). (G) Migration Test (Colo357 TUSC3 shRNA2 vs Colo357 Scramble  $p < 0.0001$ , Colo357 TUSC3 shRNA3 vs Colo357 Scramble  $p < 0.0001$ ). (H, I) Invasion Test (Colo357 TUSC3 shRNA2 vs Colo357 Scramble  $p < 0.0001$ , Colo357 TUSC3 shRNA3 vs Colo357 Scramble  $p < 0.0001$ ). (J) Wound healing test showed more rapid closure of the gap in TUSC3 silenced cells. All experiments were performed three times with representative figures shown as above.

doi:10.1371/journal.pone.0151752.g001

## Reference

1. Fan X, Zhang X, Shen J, Zhao H, Yu X, Chen Y, et al. (2016) Decreased TUSC3 Promotes Pancreatic Cancer Proliferation, Invasion and Metastasis. PLoS ONE 11(2): e0149028. doi:[10.1371/journal.pone.0149028](https://doi.org/10.1371/journal.pone.0149028) PMID: [26871953](https://pubmed.ncbi.nlm.nih.gov/26871953/)
